# Supplementary material
Source: PubMed Central journal article supplement (PMC8914498)
Supplement: oyab046_suppl_supplementary_figures.pdf [file oyab046_suppl_supplementary_figures.pdf]

Supplemental Figures for:

A Randomized Phase II Trial of mFOLFOX6 + Bevacizumab Alone or with AdCEA Vaccine + Avelumab Immunotherapy for Untreated Metastatic Colorectal Cancer

Jason Redman et al.

Supplemental Figure for:  
A Randomized Phase II Trial of Mfolfox6 And Bevacizumab Alone or with Combination  
Immunotherapy with AdCEA Vaccine Plus Avelumab in Patients with Previously Untreated  
Metastatic Colorectal Cancer  
Redman et al.

**Supplementary Figure 1**

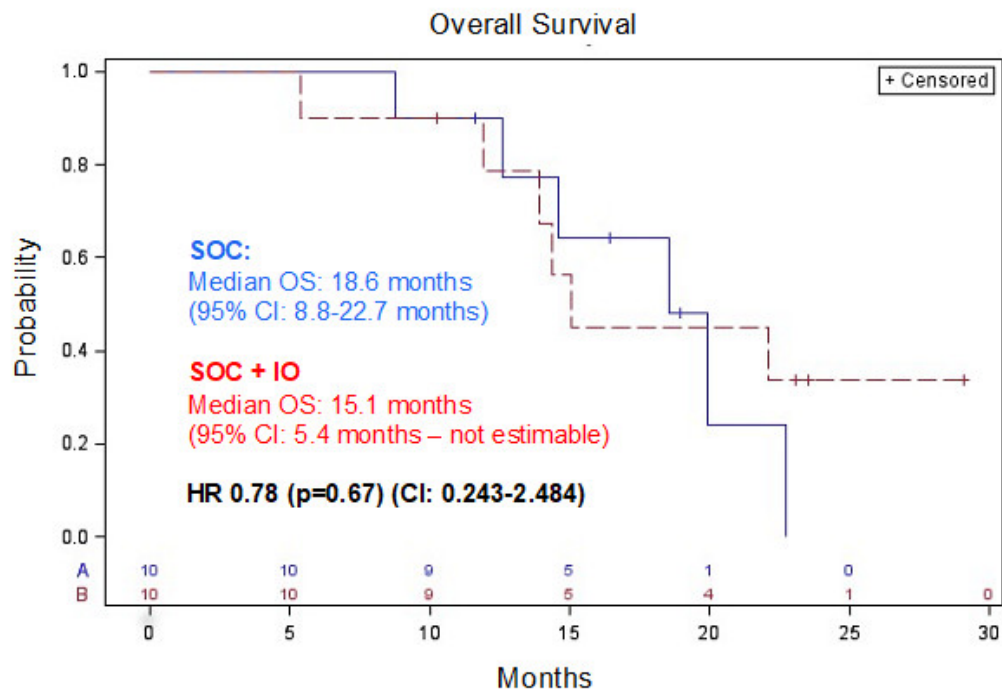

Overall survival in months since enrollment for patients treated with SOC or SOC + IO.  
Abbreviations: SOC, standard of care; SOC + IO, standard of care plus immunotherapy.

Supplemental Figure 2

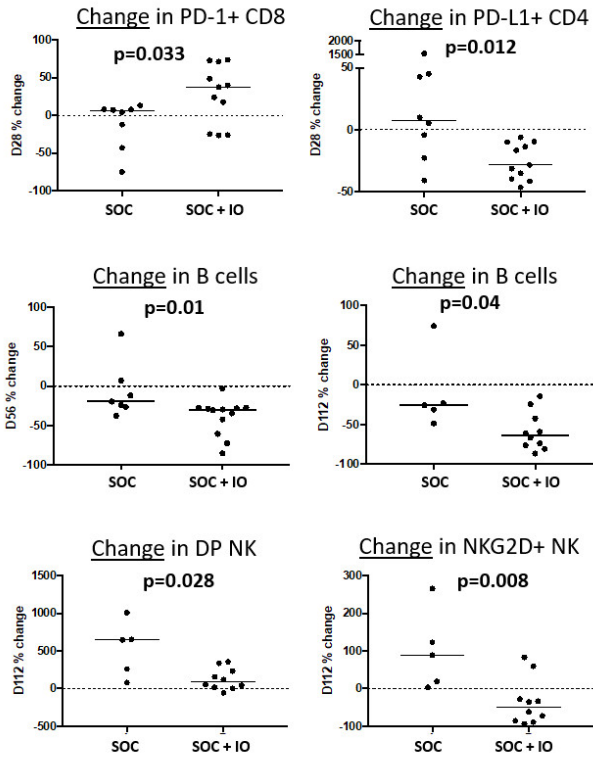

**Supplemental Figure 2.** Changes in immune parameters that differ between patients treated with SOC or SOC + IO.

Abbreviations: SOC, standard of care; SOC + IO, standard of care plus immunotherapy.

**Supplemental Figure 2.** Changes in immune parameters that differ between patients treated with SOC or SOC + IO.

Abbreviations: SOC, standard of care; SOC + IO, standard of care plus immunotherapy.
